# Supplementary material for: Role of Critical Stress in Quantifying the Magnitude of Fluid-Injection Triggered Earthquakes
Source: Research Square preprint supplement (doi:10.21203/rs.3.rs-3287787/v1), 2023-09-18
Supplement: Supplementary file 1 [file Literature data.xlsx]

## Sheet: Sheet1
Event	ΔV(m3)	M0(max)	Type	Location	Reference	Reference
SJ	65000	8910000000000000	frack	Fort St. John ,Canada	Mahani et al. (2017)	1
POH	12800	2e+17	egs	Pohang (PX-2),South Korea	Grigoli et al. (2018),	2,3
					Kim et al. (2018)
SG	700	100000000000000	egs	St. Gallen, Switzerland	Diehl et al. (2017)	4
GSF	1.31	62100000000	scientific	southeast France	Guglielmi et al., ( 2015)	5
	28000000	1120000000000000	wd	Venus, Texas	Scales et al. (2017)	6
	14500000	1580000000000000	wd	Dagger Draw, New Mexico	Sanford et al. (2006)	7
	1800000	8910000000000000	wd	Tejon, Central Valley (WWF),	Goebel et al. (2016)	8
				Kern County, California
	625000	2.11e+16	wd	Rocky Mountain	Healy et al. (1968)	9
				Arsenal (Denver), Colorado
	4900000	1e+17	wd	Raton Basin,	Rubenstein et al. (2014)	10
				Colorado and New Mexico
	200	562000	frack	Western Canada	Maxwell et al. (2009)	11
	1100	562000000	frack	Cotton Valley, Texas	Urbancic et al. (1999)	12
	94200	2240000000000	frack	Ryser well,	Friberg et al. (2014)	13
				Harrison County, Ohio
	302000	12600000000000	frack	Fox Creek (Well Pad 4)	Bao and Eaton (2016)	14
	126000	25100000000000	frack	Fox Creek (Well Pad 2)	Bao and Eaton (2016)	14
	40300	25100000000000	frack	Fox Creek (Well Pad 5)	Bao and Eaton (2016)	14
	37400	35500000000000	frack	Fox Creek (Well Pad 6)	Bao and Eaton (2016)	14
	26800	398000000000000	frack	Fox Creek (Well Pad 3)	Bao and Eaton (2016)	14
	61100	794000000000000	frack	Fox Creek (Well Pad 1)	Bao and Eaton (2016)	14
	13000	35500000	egs	Groẞ-Schönebeck,Germany	Zang et al. (2014)	15
	5600	562000000000	egs	Bad Urach,Germany	Evans et al. (2012)	16
	10100	1120000000000	egs	Ogachi (OGC-1),Japan	Kaieda et al. (2010)	17
	41300	4320000000000	egs	Newberry,US	Breede et al. (2013)	18
	3100	6310000000000	egs	Well Paralana 2,Australia	Albaric et al. (2014)	19
	200	143000000000	scientific
	4170	3200000000000	frack
	17500	35000000000000	frack
	20000	398000000000000	egs
	39800	25100000000000	egs
	11500	141000000000000	egs
	282000	89000000000000	wd
	61700	282000000000000	wd
	340000	800000000000000	wd
	83400	830000000000000	wd
	3287000	3160000000000000	wd
	426000	4500000000000000	wd
	629000	1.2e+16	wd
	1190000	2e+16	wd
	625000	2.1e+16	wd
	991000	2.21e+16	wd
	7840000	1e+17	wd
	12000000	3.92e+17	wd
